# Supplementary material for: DNA methylation clocks as a predictor for ageing and age estimation in naked mole-rats, Heterocephalus glaber
Source: Aging (Albany NY). 2020 Mar 3;12(5):4394–406. doi: 10.18632/aging.102892 (PMC7093186; doi:10.18632/aging.102892)
Supplement: Supplementary File 1 [file aging-12-102892-s001..csv]

Supplementary File 1. Raw data set.
Contig:position	a1	a10	a11	a12	a2	a3	a4	a5	a6	a7	a8	a9	b1	b10	b11	b12	b2	b3	b4	b5	b6	b7	b8	b9	A3	A4	B10	A8	D5	A10	B2	D1	C12	D7	C9	A12	A5	B4	C1	B3	C8	B5	D12	A9	D9	B1	D8	A7	B6
JH602048:1786784	0.004854369	0.003355705	0	0.004470939	0	0.003514938	0.00309119	0.005235602	0	0	0.002164502	0.002403846	0	0.004322767	0.003836317	0	0.003442341	0.003448276	0.011881188	0.001680672	0.002386635	0.002347418	0.002475248	0.004098361	0.003626985	0.003210273	0.003009956	0.003219351	0.001620746	0.002869646	0.003027754	0.001477105	0.002420758	0.002930665	0.001646583	0.003206413	0.002805049	0.002453634	0.004807692	0.009685888	0.002367985	0.01725599	0.003149023	0.003001394	0.007339634	0.003076923	0.003331872	0.001755786	0.003874652
JH602048:1786796	0.002439024	0	0.00173913	0.004470939	0.003333333	0.001763668	0.00309119	0.006980803	0.001538462	0	0.014989293	0.002409639	0	0.002890173	0.005121639	0.002173913	0.003454231	0.005163511	0.002012072	0	0	0	0	0.004098361	0.004390958	0.004926904	0.003509319	0.00360852	0.003502218	0.003907663	0.005090786	0.005207042	0.021835372	0.013009292	0.003468034	0.003941783	0.041098559	0.00472796	0.011990408	0.030161998	0.005646123	0.039239544	0.003854833	0.005523665	0.003679853	0.00617284	0.003983711	0.004417671	0.004178368
JH602048:1786806	0.06833713	0.003355705	0.003460208	0.005988024	0	0.001760563	0.00310559	0.001751313	0	0.004255319	0	0	0.005434783	0	0.003841229	0.004338395	0.006872852	0.001727116	0.005988024	0	0.004761905	0.009345794	0.009852217	0.004106776	0.003394762	0.006013952	0.004024768	0.003057036	0.00370199	0.005170185	0.012697352	0.003199606	0.050003618	0.005574614	0.003888432	0.004712252	0.012726188	0.0041182	0.021301775	0.026231263	0.004505217	0.052063161	0.003353517	0.005041837	0.034313725	0.01529052	0.004216074	0.003834172	0.014449696
JH602048:1786834	0.00245098	0.005136986	0	0.001503759	0.077399381	0.003571429	0.0015625	0	0.006259781	0.005657709	0.021413276	0.039443155	0	0.002923977	0.00260078	0.004357298	0	0	0.044401544	0.001692047	0.071588367	0.002375297	0.03874092	0.008333333	0.003148971	0.002333816	0.005779901	0.003655989	0.003007171	0.002443582	0.002948113	0.001478197	0.003561146	0.011772215	0.003585836	0.002809552	0.010442566	0.042824475	0.017772512	0.002554278	0.004497751	0.050908008	0.004907862	0.007050529	0.014372692	0.003076923	0.005868956	0.002792405	0.005371227
JH602048:1786845	0.002512563	0.005272408	0.001808318	0.00308642	0.209944751	0.06996587	0.028346457	0.003623188	0.0032	0.002941176	0.076923077	0.045454545	0.001897533	0.011958146	0.002724796	0.002207506	0.065068493	0.003610108	0.036144578	0.116923077	0.05399061	0.002439024	0.048899756	0.004210526	0.009879518	0.005140562	0.006325696	0.008847255	0.018463643	0.004523912	0.023862604	0.016289813	0.005672793	0.047517973	0.032590549	0.005119454	0.0076	0.010335175	0.046082949	0.105750328	0.005992273	0.161774385	0.006383569	0.025710988	0.063295951	0.009174312	0.005174077	0.016853048	0.013889825
JH602048:1786847	0.007712082	0.005291005	0.001811594	0.06295754	0.12654321	0.003669725	0.029874214	0.007312614	0.019386107	0.027900147	0.028077754	0.052380952	0.033771107	0.004601227	0	0.004576659	0.003584229	0.001851852	0.097142857	0.008741259	0.007425743	0.002493766	0.075980392	0.025263158	0.008067769	0.006025064	0.004643603	0.011460323	0.006251447	0.006397815	0.005400388	0.016536965	0.008686457	0.038922363	0.026692088	0.00552098	0.012243679	0.011565261	0.075027996	0.079594423	0.006545741	0.175814918	0.02290355	0.056505803	0.134101301	0.01529052	0.007719298	0.029074753	0.0135318
JH602048:1786852	0.131111111	0.001782531	0.005415162	0.010769231	0.049668874	0.103109656	0.083333333	0.064013841	0.001612903	0.002941176	0.125984252	0.120879121	0.038181818	0.036982249	0.002673797	0.058315335	0.017953321	0.001821494	0.082533589	0.003478261	0.223076923	0.004975124	0.022613065	0.044624746	0.00985419	0.007987858	0.005851555	0.009683555	0.034691137	0.006579888	0.004284634	0.030136331	0.016931454	0.071727993	0.081618608	0.005697151	0.069980379	0.01755633	0.074776786	0.137928318	0.007223618	0.157748895	0.057277982	0.103833558	0.117116312	0.012195122	0.005597831	0.048379735	0.018678449
JH602048:1786857	0.036144578	0.00676819	0.005244755	0.001533742	0.146131805	0.167664671	0.018691589	0.007029877	0.01843318	0.004279601	0.147663551	0.049180328	0.03374778	0.004379562	0.003880983	0.002192982	0.017241379	0.001736111	0	0.078740157	0.002403846	0	0.070093458	0.04	0.007546564	0.00528592	0.004239575	0.011816457	0.006222632	0.0036567	0.003028519	0.065483053	0.008868846	0.050952381	0.048617052	0.00510051	0.050763359	0.019578634	0.076837416	0.116111829	0.006289803	0.174712049	0.062881031	0.092594399	0.055905963	0.021212121	0.004030138	0.066895369	0.017828418
JH602048:1786864	0.117505995	0.003717472	0.007476636	0.001663894	0.068493151	0.079646018	0.006734007	0.007648184	0.001709402	0.001572327	0.014051522	0.023684211	0.003984064	0.004731861	0.001440922	0.007092199	0.001834862	0.018315018	0.002227171	0.001834862	0	0	0	0.026548673	0.003726205	0.004837539	0.004425466	0.005157343	0.004404265	0.004466537	0.004820296	0.003215434	0.005162074	0.021812791	0.017833358	0.004534919	0.005729795	0.01693704	0.015550239	0.040377325	0.004996827	0.035651843	0.004558564	0.005591999	0.003648156	0.00625	0.004934355	0.019544487	0.006046863
JH602048:1786866	0.202898551	0.001808318	0.001912046	0.04496124	0.05	0.046296296	0.001689189	0.001858736	0.001644737	0.003076923	0.054347826	0.099526066	0	0.001538462	0.005555556	0.002403846	0.00744879	0.001872659	0.053830228	0	0	0.002525253	0.002702703	0.00443459	0.005115713	0.017050434	0.003654175	0.004903678	0.005793743	0.003257565	0.00297847	0.004698318	0.003500495	0.020499046	0.013150074	0.004429679	0.006022887	0.003701553	0.024970273	0.039430643	0.004592604	0.064233038	0.022658748	0.08560966	0.011568253	0.033033033	0.004144255	0.017449664	0.004241056
JH602048:1786873	0.037037037	0.003577818	0.001841621	0.030864198	0.210084034	0.050089445	0.001639344	0.003731343	0.003327787	0	0.086134454	0.160869565	0	0.001538462	0.001364256	0.004514673	0.017985612	0.040564374	0	0.001776199	0.00255102	0.007575758	0.021108179	0.113948919	0.002360602	0.008391157	0.001950382	0.004384042	0.012209168	0.002106487	0.003134	0.00247586	0.001685049	0.061724208	0.077618584	0.020630827	0.069235117	0.020095831	0.045191194	0.086792136	0.002466582	0.159157363	0.007357735	0.088833992	0.084097287	0.009174312	0.002208285	0.027960526	0.005545287
JH602048:1786879	0.011049724	0.003891051	0.005847953	0.003327787	0.051470588	0.00621118	0.019130435	0.007936508	0.005235602	0.003246753	0.023809524	0.072727273	0	0.006578947	0.007194245	0.005025126	0.02480916	0.001972387	0.006772009	0.001930502	0.002739726	0.002631579	0.210526316	0.002375297	0.006634304	0.005962453	0.00642216	0.011372515	0.012646585	0.00689903	0.006322178	0.023498062	0.006368461	0.028599467	0.025255121	0.004732655	0.012581128	0.010796027	0.024852071	0.03708621	0.006551942	0.067969726	0.006324993	0.012176885	0.040511519	0.012307692	0.00624121	0.007257357	0.011259581
JH602048:1786881	0.026041667	0.060218978	0	0.005025126	0	0.069852941	0.006968641	0.002016129	0.010169492	0.001572327	0.032941176	0	0	0	0.002766252	0.004926108	0	0.001937984	0.004484305	0	0	0.081339713	0.021917808	0.004576659	0.004438347	0.005934718	0.0055577	0.005654632	0.006468006	0.004238201	0.003622273	0.005646943	0.004993191	0.017448432	0.010776663	0.004719349	0.034780919	0.006555251	0.040509259	0.045032416	0.004339935	0.076421114	0.009411331	0.105141314	0.037304688	0.003076923	0.005436212	0.016770333	0.00814664
JH602048:1786884	0.158013544	0.022058824	0.005736138	0.001633987	0.063829787	0.161184211	0	0.001976285	0.003384095	0.00466563	0.074829932	0.026595745	0.002004008	0.003384095	0	0	0.003853565	0	0	0.001876173	0.002808989	0.002688172	0.024456522	0.004576659	0.005074507	0.004809619	0.003858025	0.016920038	0.004390018	0.002799512	0.003028773	0.01386524	0.004985647	0.039809904	0.023415776	0.002007226	0.034542985	0.016445963	0.056882821	0.074782167	0.004972376	0.119397832	0.013834173	0.110696874	0.028709075	0.024169184	0.004117389	0.004936306	0.00421568
JH602048:1786888	0.003021148	0.004123711	0.002136752	0	0.004	0.006342495	0.037567084	0.002178649	0.007604563	0	0.045112782	0.042134831	0.002207506	0.001751313	0.009104704	0	0.028571429	0.00610998	0	0.002008032	0.008571429	0.002985075	0	0	0.021930172	0.004569505	0.004317323	0.004867026	0.004616805	0.003515569	0.003699966	0.049917975	0.004606207	0.012671669	0.009355509	0.002807299	0.009164259	0.012219523	0.020094563	0.025300668	0.005895763	0.044933723	0.004716981	0.086435517	0.004335552	0.006153846	0.003594599	0.004535328	0.009130258
JH602048:11061433	0.01065404	0.09818772	0.168004699	0.200331469	0.115362971	0.013169447	0.169931555	0.173913043	0.004321521	0.169338266	0.183691558	0.084547182	0.055512523	0.082221617	0.002535497	0.152538314	0.119656134	0.056042497	0.090664273	0.120635822	0.179622432	0.107820213	0.081924577	0.032411067	0.103416221	0.384352774	0.323042138	0.351748042	0.041983351	0.353442213	0.366540769	0.060009718	0.363686675	0.106096815	0.101342918	0.184719864	0.161710873	0.300087323	0.072830353	0.29349013	0.322980017	0.195987985	0.400618119	0.091044888	0.140668614	0.117450908	0.379570517	0.130407187	0.336885689
JH602048:11061439	0.002983294	0.001195815	0.003991547	0.098203872	0.132433921	0.226645191	0.120229484	0.005273566	0.084790673	0.001975309	0.121414914	0.002073255	0.001635769	0.082536212	0.003297818	0.093292213	0.117262322	0.002525961	0.001963993	0.002897618	0.172732363	0.034628378	0.053648069	0.081345719	0.037101811	0.30568568	0.20098206	0.308026526	0.028393098	0.260133471	0.276868327	0.027777778	0.272842516	0.026669899	0.049003542	0.146127514	0.11640355	0.266387727	0.034984098	0.169737687	0.229576418	0.131719494	0.331247978	0.042724263	0.048776978	0.100151172	0.301752795	0.127323557	0.321819122
JH602048:11061444	0.011272619	0.040011514	0.004221388	0.004127967	0.050903614	0.06994747	0.059466667	0.003630363	0.003757225	0.002225519	0.087893043	0.08091749	0.00353453	0.106088806	0.053240183	0.139653912	0.118565106	0.00168492	0.089955022	0.002899485	0.002692696	0.034046145	0.032311062	0.002990756	0.070391129	0.284869697	0.183307681	0.268896612	0.018905227	0.202623836	0.269029276	0.019016227	0.234370188	0.040124194	0.080886483	0.12193156	0.083058113	0.230743512	0.030621572	0.131903901	0.273431304	0.095111487	0.279279279	0.034583961	0.030054244	0.036466775	0.231101751	0.053287197	0.245952703
JH602048:11061490	0.089478045	0.018985464	0.061733898	0.002866076	0.091201403	0.036426713	0.135229541	0.303652423	0.003502627	0.068659505	0.107081174	0.082665812	0.005204054	0.082525616	0.003840246	0.136735199	0.083312853	0.194534507	0.062984797	0.116777746	0.002385821	0.044369559	0.184067877	0.090405439	0.110535107	0.395143576	0.373359206	0.357409291	0.093543235	0.346585077	0.370934287	0.044192075	0.391070556	0.081102677	0.12134952	0.233646053	0.144829843	0.288821193	0.083943177	0.218596231	0.344469222	0.175839886	0.377747734	0.044634452	0.057685468	0.117973373	0.37036534	0.159837805	0.341490426
JH602051:26386627	0.176130895	0.106199358	0.151441111	0.061131387	0.168414284	0.15369339	0.168614357	0.19536739	0.090516322	0.186579517	0.14530029	0.12748028	0.192519612	0.167686054	0.120188757	0.06182755	0.04901885	0.044173418	0.05750968	0.089606591	0.313293912	0.008466557	0.097563812	0.136247274	0.181499416	0.325333937	0.246248178	0.308959815	0.126828657	0.29622905	0.334988744	0.123964038	0.337052057	0.081282943	0.116339477	0.328901371	0.196260982	0.276831105	0.104987911	0.191298368	0.255025149	0.238126622	0.327473014	0.099248377	0.123110815	0.139970166	0.321129687	0.138947928	0.336634531
JH602051:26386652	0.01352343	0.013953488	0.031317829	0.009920073	0.01174812	0.047042815	0.092997626	0.004035196	0.003680982	0.003378027	0.00581788	0.078411937	0.065486821	0.024420677	0.021534812	0.002689907	0.007655734	0.042950876	0.071279583	0.01038961	0.003662129	0.032502551	0.098814229	0.011127999	0.068367707	0.082903284	0.121913036	0.11018866	0.032603568	0.095047905	0.055330173	0.017368519	0.175858524	0.033942251	0.02074161	0.187100302	0.025801763	0.119442905	0.060707984	0.058393213	0.086317121	0.048332776	0.13833743	0.015197341	0.006009232	0.008249538	0.151966539	0.046505766	0.142326172
JH602080:19159935	0.020457698	0.063013699	0.073122853	0.05432661	0.034831069	0.043409629	0.040891491	0.075502008	0.052083333	0.040870297	0.058939459	0.064630761	0.047360177	0.065652592	0.069854343	0.110181644	0.025650322	0.003186526	0.031723143	0.025128973	0.033450019	0.034586971	0.041006317	0.061605938	0.049326292	0.042335008	0.115785104	0.081264015	0.066962717	0.061198179	0.088680246	0.048658736	0.083913996	0.036908145	0.073580012	0.067309212	0.044716575	0.084760026	0.07750449	0.08516957	0.038343446	0.071231571	0.066847488	0.070715161	0.094319288	0.090415475	0.080108424	0.057651115	0.1182273
JH602080:19159955	0.065654899	0.119517911	0.161875276	0.094329843	0.055230893	0.061968291	0.048709526	0.023046655	0.127512447	0.132532727	0.069548301	0.108635689	0.092892329	0.073371448	0.070739306	0.14438421	0.046511628	0.002387177	0.052316891	0.060707993	0.007168459	0.07600516	0.083773505	0.067811331	0.087828178	0.144695728	0.173747171	0.141959507	0.096204411	0.112499048	0.145708525	0.080748422	0.158198121	0.089138509	0.123509967	0.13716895	0.107545702	0.124163404	0.091692867	0.129359511	0.162304165	0.10451829	0.123806999	0.116403065	0.128815486	0.134844676	0.124707283	0.090989266	0.164234313
JH602080:19159979	0.169813903	0.310830861	0.366115764	0.283787011	0.153509391	0.132637854	0.264380101	0.301928549	0.333300628	0.248891786	0.206446047	0.167581699	0.314519567	0.171295337	0.257165417	0.273170732	0.244279946	0.220943762	0.191744472	0.241935484	0.250584112	0.199315879	0.269998846	0.199423591	0.291550791	0.377404497	0.350007649	0.306840289	0.278847818	0.286432623	0.314583774	0.268589398	0.307022839	0.211361672	0.288681627	0.318229167	0.275424623	0.25751964	0.246935237	0.271669452	0.356280667	0.221710921	0.297206371	0.267912309	0.238661318	0.305832174	0.29600972	0.226987941	0.274714022
JH602080:19160007	0.22912671	0.307142857	0.332676389	0.270403147	0.230669434	0.18728744	0.298888162	0.231753718	0.365805356	0.337052534	0.257836081	0.263084276	0.321644395	0.276000365	0.257415507	0.34266334	0.254699876	0.404084902	0.254474069	0.274484771	0.243174698	0.279899437	0.315915785	0.271321824	0.327347135	0.399361372	0.383648409	0.39035744	0.336136374	0.360884204	0.381580627	0.269264677	0.362594444	0.251705422	0.305338944	0.375649117	0.315150304	0.293584583	0.291153135	0.33685269	0.390599487	0.280175043	0.364887858	0.330978465	0.276670476	0.313682933	0.356778019	0.285637568	0.320337632
JH602123:5429137	0.004600899	0.003467844	0.003601935	0.003805095	0.003399296	0.003388036	0.003452244	0.004542818	0.005017921	0.028606265	0.003283735	0.005120036	0.010002151	0.003378378	0.004145718	0.061681416	0.002868817	0.003468573	0.002311502	0.004884933	0.003296251	0.011948821	0.003572202	0.014285714	0.025251322	0.005235849	0.004365915	0.039533196	0.013368984	0.02529543	0.024444987	0.020731226	0.048293865	0.004574309	0.026073449	0.011238293	0.005460855	0.027007562	0.007491627	0.052836355	0.007013221	0.028468344	0.059212639	0.004289544	0.004407114	0.006093103	0.018502251	0.015209125	0.05288742
JH602123:5429173	0.042014211	0.015266383	0.004626298	0.00370018	0.031607501	0.022739072	0.003243696	0.01774132	0.014904187	0.004709727	0.038217822	0.00387332	0.002384307	0.033902806	0.004233551	0.003851935	0.004081278	0.009921671	0.004831448	0.006502655	0.029491423	0.002135839	0.002816596	0.042517762	0.012024338	0.009161812	0.017586539	0.085539607	0.006438773	0.06129165	0.015752683	0.006798834	0.095235985	0.0214738	0.011597793	0.025835555	0.013466309	0.055354854	0.015302553	0.063944323	0.038805559	0.075138797	0.061262416	0.009467929	0.053575829	0.015332609	0.025192213	0.021707472	0.073734252
JH602123:5429210	0.078371148	0.004723418	0.02888666	0.103576184	0.144241793	0.094138031	0.062868949	0.026656584	0.090534594	0.064408311	0.136686811	0.061607814	0.05278864	0.018263608	0.031483229	0.034162339	0.045598269	0.003992016	0.041053857	0.069623465	0.091881746	0.072747122	0.083175615	0.038997214	0.083829654	0.045832956	0.089226143	0.087576915	0.032050185	0.099447514	0.113426747	0.012889671	0.198020191	0.090924592	0.048489666	0.102484179	0.04978545	0.156854587	0.041617021	0.13369631	0.107842302	0.183543778	0.185306713	0.035449942	0.100950508	0.062205358	0.123203688	0.048847396	0.218294885
JH602123:5429240	0.499595394	0.499784443	0.499577448	0.49934461	0.499641114	0.499782703	0.499784761	0.49974655	0.499758279	0.499663602	0.499701742	0.499666132	0.499586645	0.499733191	0.499664655	0.499780147	0.499670101	0.499104441	0.499519693	0.499682862	0.499700204	0.499689016	0.499558861	0.499727483	0.499815711	0.499916553	0.499896206	0.499956134	0.499925884	0.499902066	0.499937099	0.499869901	0.499864555	0.499905723	0.499914107	0.499854401	0.499871028	0.499875771	0.499955429	0.499896771	0.499915944	0.499872077	0.499862429	0.499712089	0.499868849	0.499814678	0.499816752	0.499848113	0.49997417
JH602136:8746420	0.028519538	0.002278411	0.002515165	0.002111932	0.021916303	0.060452542	0.003483529	0.002914885	0.00277613	0.002811785	0.01270922	0.00652161	0.002933563	0.002692578	0.002745144	0.003809524	0.002986702	0.002458284	0.024372726	0.002831088	0.00260314	0.042125172	0.002194765	0.014236774	0.003338194	0.003729256	0.003830684	0.007227332	0.007074609	0.003464567	0.003309994	0.001891267	0.006165414	0.004444652	0.007940555	0.011940299	0.008541872	0.006478503	0.005650022	0.002530552	0.002721792	0.048385996	0.004334489	0.00315495	0.027454414	0.00228833	0.014944241	0.002403683	0.03822841
JH602136:8746436	0.346863962	0.148757779	0.106611022	0.083090315	0.33005421	0.291671261	0.256189146	0.148205262	0.066853545	0.054458719	0.265456704	0.292671585	0.082269278	0.203039502	0.100248045	0.22654825	0.226920343	0.245053703	0.146463269	0.163441303	0.212645591	0.258876584	0.361226051	0.268729642	0.075358809	0.089015604	0.034064708	0.115945024	0.061392381	0.13633052	0.141143338	0.176240274	0.111354006	0.223281815	0.214126952	0.089705305	0.179968034	0.272790559	0.164054715	0.302667933	0.026923336	0.268095388	0.211671508	0.152982243	0.253443635	0.244465762	0.153995345	0.092125547	0.237818528
JH602136:8746439	0.326853073	0.117609444	0.047919905	0.017193265	0.331091946	0.209813285	0.206909735	0.115289826	0.084810044	0.007948299	0.291722732	0.296055538	0.062724638	0.13719092	0.114491345	0.08842705	0.136171258	0.038976887	0.18841822	0.15381592	0.184376548	0.121523947	0.331775786	0.193040959	0.001386375	0.001944434	0.000961908	0.005737101	0.003266773	0.001719721	0.010375369	0.001742893	0.003845284	0.012398997	0.010576818	0.00185273	0.002336348	0.01501461	0.004208482	0.01919689	0.001519652	0.014635181	0.012576951	0.003690476	0.004278018	0.004334697	0.004794958	0.002777966	0.017073021
JH602136:8746445	0.287729666	0.037231619	0.00430716	0.003117132	0.229518058	0.273205498	0.126425582	0.128604341	0.021390125	0.025470115	0.178076687	0.265271654	0.015599903	0.054951637	0.024281354	0.048369542	0.043116981	0.185838555	0.084517173	0.12504483	0.199539151	0.222421668	0.23855802	0.13810214	0.026634201	0.015591596	0.004364472	0.028545503	0.047568916	0.009631433	0.050761832	0.009593898	0.030155178	0.103714322	0.113745928	0.020032119	0.081698436	0.144547727	0.074807095	0.144581502	0.006971393	0.186897318	0.074175143	0.042362223	0.10801229	0.075255217	0.030390545	0.062358746	0.141777444
JH602136:8746449	0.195418771	0.086345943	0.080873614	0.004546869	0.190898077	0.177594813	0.085374047	0.037063817	0.017180926	0.012706543	0.141641172	0.215633486	0.035335352	0.033855586	0.048851913	0.09240845	0.018999828	0.012434877	0.120184001	0.110781933	0.10013763	0.163594272	0.224667004	0.156301146	0.040634803	0.030047902	0.020639524	0.064433928	0.030428056	0.04582147	0.036880711	0.035292753	0.09649662	0.128933262	0.077376117	0.019945909	0.084778649	0.170088864	0.070739065	0.109164049	0.035716663	0.1435677	0.11874705	0.055273834	0.087359876	0.067770399	0.042538263	0.03963782	0.15795556
JH602136:8746451	0.211083437	0.07001819	0.004330742	0.003479304	0.263951317	0.317653314	0.098124428	0.087973783	0.014817772	0.003783824	0.131901074	0.193010805	0.057750618	0.106990613	0.030210316	0.065025421	0.039312712	0.195301057	0.101298529	0.040106109	0.018507478	0.124316786	0.254188072	0.090146696	0.018160493	0.036078007	0.031513389	0.057779248	0.020034528	0.036988156	0.045816733	0.097566943	0.086380701	0.090885751	0.06646536	0.067582263	0.088686103	0.170622583	0.103595932	0.125982119	0.024757151	0.165715659	0.102920807	0.05337333	0.075228187	0.096956579	0.07055411	0.036471975	0.184186332
JH602136:8746467	0.04966961	0.011486338	0.004098707	0.028238814	0.065575206	0.002329373	0.024111581	0.003549738	0.003299625	0.018688613	0.045472009	0.084233261	0.017832414	0.032784278	0.039851174	0.009026884	0.020258972	0.025776699	0.026052871	0.012101567	0.021764949	0.001969864	0.063208292	0.030198375	0.008095311	0.014385305	0.020972965	0.017511662	0.004279077	0.031082092	0.020298433	0.092983939	0.025602299	0.065220256	0.046932923	0.006043461	0.034397726	0.090170054	0.034843024	0.036540296	0.005464105	0.100973628	0.047859103	0.033727299	0.056840318	0.04621399	0.029882604	0.024976016	0.072309385
JH602136:8746480	0.075012863	0.00363433	0.003773105	0.003623449	0.03458901	0.014439694	0.078917832	0.023913812	0.004129387	0.003682416	0.053710671	0.007803923	0.004264235	0.03770299	0.01497309	0.003226231	0.003664122	0.004763677	0.0253677	0.057233581	0.06693447	0.004037926	0.052551429	0.014980326	0.01118381	0.019732981	0.005619696	0.007645673	0.00884202	0.003532827	0.005754422	0.009321302	0.012322629	0.046832326	0.02741095	0.024818071	0.010023989	0.035430129	0.024136474	0.096276417	0.006040222	0.055017278	0.034562956	0.005871886	0.004112623	0.004518072	0.019358606	0.024455622	0.040229885
JH602136:8746485	0.008143039	0.005292618	0.003824779	0.004241146	0.044355561	0.013751601	0.013653072	0.003549246	0.011438255	0.003135654	0.016360034	0.025435074	0.003451336	0.003487991	0.00452721	0.008352648	0.004249847	0.003283092	0.003401444	0.004003595	0.00577246	0.013209839	0.004820321	0.017204181	0.006271511	0.005025687	0.00478359	0.014342691	0.006909165	0.003984342	0.003899462	0.003295386	0.003652659	0.012436195	0.009704503	0.003695904	0.008748606	0.027320708	0.003398058	0.015661182	0.006380351	0.017336152	0.028238662	0.003922268	0.00777556	0.010146398	0.007323508	0.008509064	0.042356174
JH602136:8746507	0.003066499	0.004144069	0.003814852	0.004727849	0.003807384	0.072362706	0.00339464	0.002724493	0.003161924	0.003515333	0.003994827	0.003880713	0.003736921	0.004265092	0.004308137	0.003525316	0.00268297	0.002935762	0.00331451	0.004228387	0.004245221	0.004022032	0.003100101	0.004456124	0.003378897	0.004767403	0.003601257	0.003296362	0.002571848	0.003533322	0.003180527	0.002130341	0.004253717	0.003605206	0.002781743	0.00369511	0.003063911	0.003315319	0.002321438	0.004066543	0.003474731	0.00606147	0.005393887	0.005931198	0.003745714	0.00282211	0.005965935	0.004424629	0.004968327
JH602136:8746512	0.022595947	0.005339563	0.004074011	0.011375586	0.014474785	0.004982483	0.037350818	0.005197476	0.004331477	0.004692726	0.007741048	0.013977316	0.003811032	0.003878976	0.021458242	0.003681009	0.003525059	0.00403678	0.004373572	0.012266609	0.029337523	0.004772167	0.015275032	0.010147105	0.004025765	0.003990304	0.003717472	0.003261123	0.003386235	0.005588543	0.003186472	0.004315124	0.004780367	0.003794266	0.00303918	0.004424969	0.004610479	0.004268847	0.003507636	0.004927322	0.004849194	0.005564275	0.004469348	0.008232159	0.039818728	0.003163171	0.003882165	0.003719735	0.006878602
JH602136:8746515	0.002800955	0.024088774	0.002498879	0.002566151	0.003217463	0.081187402	0.003803063	0.00313427	0.003350164	0.002840481	0.025323276	0.019061758	0.005019382	0.024945144	0.003262528	0.0032356	0.003825942	0.002759867	0.002892674	0.002893279	0.002932082	0.009320598	0.004418222	0.003758212	0.003489665	0.003319905	0.002493479	0.002600932	0.003141959	0.003149386	0.003602916	0.002219756	0.003279059	0.005096077	0.003656842	0.006512704	0.002589555	0.002908166	0.00221454	0.005414718	0.003236135	0.006483791	0.004730495	0.003922967	0.038349885	0.003016151	0.004016431	0.002774207	0.003171247
JH602136:8746528	0.015083783	0.004083674	0.00399687	0.005342213	0.02730095	0.004089344	0.028017295	0.028995718	0.006063908	0.004206387	0.013805642	0.057602711	0.003701876	0.003653652	0.011964983	0.00460961	0.004234144	0.003157712	0.014074254	0.108952558	0.004115878	0.003887269	0.040939036	0.006101887	0.003374233	0.003690312	0.004096164	0.006225831	0.003669426	0.003986711	0.003983388	0.002997692	0.004852908	0.023038091	0.011033281	0.003651673	0.00482322	0.013092185	0.017755569	0.031517766	0.005905377	0.03747412	0.00472892	0.005398351	0.04044099	0.005048544	0.004107713	0.003280019	0.017771786
JH602201:46911	0.002732451	0.002474062	0.002147168	0.003297343	0.0032532	0.003120508	0.00295394	0.002896239	0.002294806	0.002882755	0.003086293	0.003206841	0.002721269	0.013045829	0.002564103	0.002461841	0.002637323	0.002977123	0.003777116	0.002362418	0.007806081	0.002915452	0.002534486	0.007832677	0.002988954	0.003565662	0.004758621	0.004683057	0.002744201	0.009680865	0.00958654	0.003768662	0.003427292	0.003314002	0.004916567	0.009145404	0.003843788	0.004223161	0.002674542	0.002771739	0.01056494	0.002361698	0.010910459	0.004599023	0.01407291	0.002168277	0.011824447	0.009353697	0.009569378
JH602201:46916	0.002923752	0.002952913	0.00258473	0.002461459	0.00215937	0.002350382	0.003181685	0.003315427	0.003251224	0.003477574	0.003785074	0.005216248	0.013267216	0.005254	0.002753165	0.003184621	0.002967449	0.003228233	0.003154902	0.003367134	0.002743536	0.003616426	0.002952306	0.003147998	0.003249496	0.006712761	0.005655953	0.003431824	0.001963222	0.00363074	0.003675264	0.003625115	0.004127317	0.004522293	0.002937077	0.011503067	0.003384095	0.003782401	0.00223152	0.010890075	0.003568015	0.003792215	0.007084829	0.003075149	0.010303851	0.002592383	0.002708837	0.003083958	0.002570199
JH602201:46935	0.017439436	0.006869986	0.00281347	0.002684173	0.00350566	0.023866676	0.003134225	0.005105884	0.003589979	0.003234969	0.003168855	0.016155876	0.002721901	0.013717607	0.003604059	0.003908286	0.003296836	0.003350976	0.004398725	0.004404776	0.004123402	0.002799813	0.004933665	0.003185931	0.004603216	0.003364058	0.006948744	0.004264214	0.005796913	0.012257678	0.018292289	0.002564227	0.012752096	0.00388634	0.00427308	0.007311067	0.003383834	0.01098234	0.002508082	0.014926976	0.010877814	0.005778285	0.016733664	0.003739572	0.010070645	0.006988087	0.003654704	0.012012645	0.007731629
JH602201:46941	0.005717794	0.004340381	0.003189238	0.002876814	0.002916191	0.002698724	0.01433511	0.002936118	0.003019878	0.003274678	0.00255207	0.007530799	0.018041574	0.013816634	0.003201369	0.003356093	0.007886815	0.002805359	0.003223235	0.025605144	0.003302931	0.00465947	0.002866639	0.003480771	0.005701698	0.005438066	0.008585165	0.012522806	0.006961614	0.009217205	0.014853733	0.002563482	0.012197657	0.003949045	0.005161546	0.023611321	0.00590355	0.006649305	0.00311943	0.015719727	0.026513973	0.007405825	0.013507176	0.004121933	0.008057836	0.008660643	0.007715825	0.007252515	0.017076719
JH602201:46962	0.003266216	0.004059217	0.004746194	0.00416438	0.004680582	0.021752577	0.004656577	0.003939318	0.004540079	0.004099007	0.004557399	0.018574724	0.004337892	0.004669712	0.005830077	0.004592323	0.004739193	0.004066694	0.00411836	0.003940354	0.003636227	0.011594761	0.004229557	0.005084746	0.004216672	0.003967453	0.008991695	0.013336647	0.005408223	0.006893782	0.003541448	0.010411669	0.005024775	0.004202483	0.002885285	0.032831122	0.004454685	0.009557483	0.001951383	0.003636561	0.003501846	0.003784363	0.003883679	0.005835087	0.004383644	0.004933979	0.004090577	0.003876998	0.008672363
JH602201:46975	0.004086983	0.0037959	0.003776764	0.00379402	0.003304945	0.021439669	0.025221492	0.003741068	0.00371619	0.003402302	0.005764638	0.019326025	0.003658861	0.014259585	0.003771552	0.010023908	0.003700334	0.003766951	0.004063347	0.03111329	0.003502429	0.003468974	0.003333472	0.004978723	0.006730956	0.004168347	0.011842826	0.023454158	0.007545206	0.008695652	0.016258583	0.006169269	0.022033084	0.004647905	0.003580842	0.054664029	0.00598389	0.016690458	0.005114236	0.004448785	0.016965127	0.005420441	0.012025554	0.004694386	0.004684903	0.003952197	0.018011527	0.004300961	0.021480315
JH602201:46977	0.002966216	0.003828209	0.002730098	0.02730548	0.003429007	0.003474538	0.017900147	0.053519442	0.00382614	0.003909644	0.004445542	0.020278475	0.003784358	0.013339653	0.004018733	0.003129346	0.044015107	0.10828276	0.004361784	0.032833126	0.003532639	0.003813378	0.004815876	0.011024287	0.006546539	0.015627078	0.017503235	0.031280547	0.016392385	0.016327072	0.03289977	0.019520091	0.023729511	0.008126984	0.009058061	0.089592313	0.010314004	0.033576248	0.011608624	0.006233738	0.025695397	0.010301954	0.016100346	0.006886657	0.011275652	0.008250516	0.020375837	0.018397191	0.033194246
JH602201:47002	0.003166634	0.003081849	0.002243655	0.002891112	0.003180122	0.003623826	0.004091922	0.003156323	0.003186425	0.004629263	0.004086181	0.003425082	0.010139501	0.012470692	0.003758321	0.006893755	0.002892021	0.002801738	0.003377085	0.002992616	0.003243447	0.002692158	0.003543143	0.0044327	0.004492188	0.004249292	0.002842485	0.00535789	0.004313162	0.009172469	0.003288176	0.003778521	0.004275601	0.004150172	0.00413532	0.026726227	0.008209929	0.010738998	0.003569835	0.011829525	0.004341164	0.004441579	0.011310085	0.003939656	0.005383682	0.003916387	0.00439496	0.009637278	0.016497462
JH602201:47029	0.006329369	0.006689936	0.005216814	0.00574288	0.007009346	0.00694546	0.007318747	0.006887475	0.009262956	0.006407077	0.007789302	0.00816537	0.006641203	0.006402276	0.006127289	0.008868713	0.022499615	0.006230022	0.007244277	0.006310169	0.007191433	0.006481669	0.005404003	0.00727176	0.006588881	0.007118958	0.008294796	0.008655305	0.009637707	0.006051545	0.007273987	0.00823596	0.007742128	0.005890622	0.008215594	0.008603736	0.00797072	0.006713421	0.008736479	0.008832698	0.007231053	0.008188021	0.007585719	0.009139454	0.006821282	0.009276438	0.006629748	0.008018653	0.007709627
[truncated: 14 more columns]
